# Supplementary material for: Photochemical synthesis of fluorescent Au16(RGDC)14 and excited state reactivity with molecular oxygen
Source: Royal Society of Chemistry journal article supplement (doi:10.1039/d3nr02258g), 2023-01-01
Supplement: d3nr02258g1.pdf [file d3nr02258g1.pdf]

**Supporting Information for**  
**Photochemical Synthesis of Fluorescent Au<sub>16</sub>(RGDC)<sub>14</sub> and Excited State Reactivity with**  
**Molecular Oxygen**  
Parimah Aminfar, Goonay Yousefalizadeh, Emily Steele, Juan Chen, Gang Zheng, and Kevin G. Stamplecoskie\*

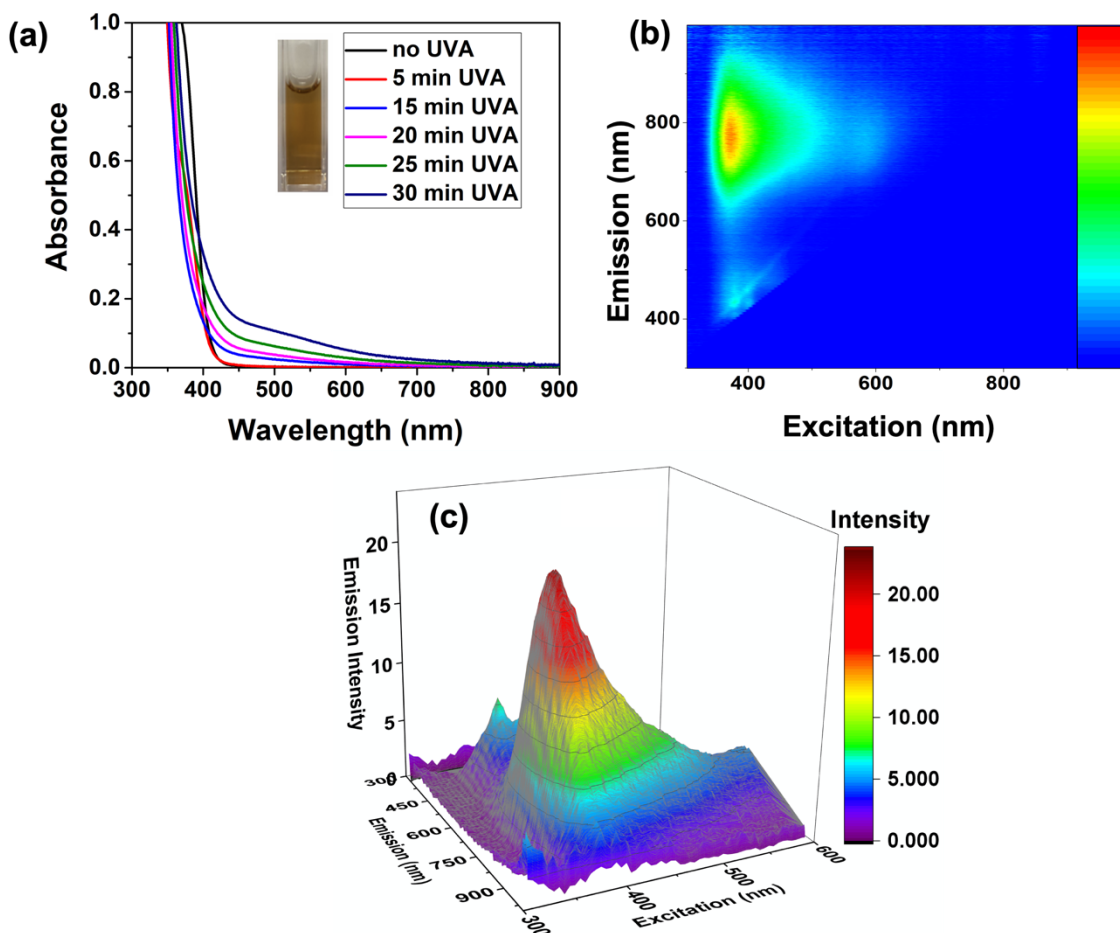

**Fig S1.** (a) Absorbance spectra of Au<sub>16</sub>(RGDC)<sub>14</sub> nanoclusters formed during 30 minutes of irradiation with UVA light, (b) fluorescence EEM contour plot of Au<sub>16</sub>(RGDC)<sub>14</sub> nanoclusters after 30 min of UVA irradiation with a single emission peak at 770 nm, and (c) 3D fluorescence EEM plot of the crude product.

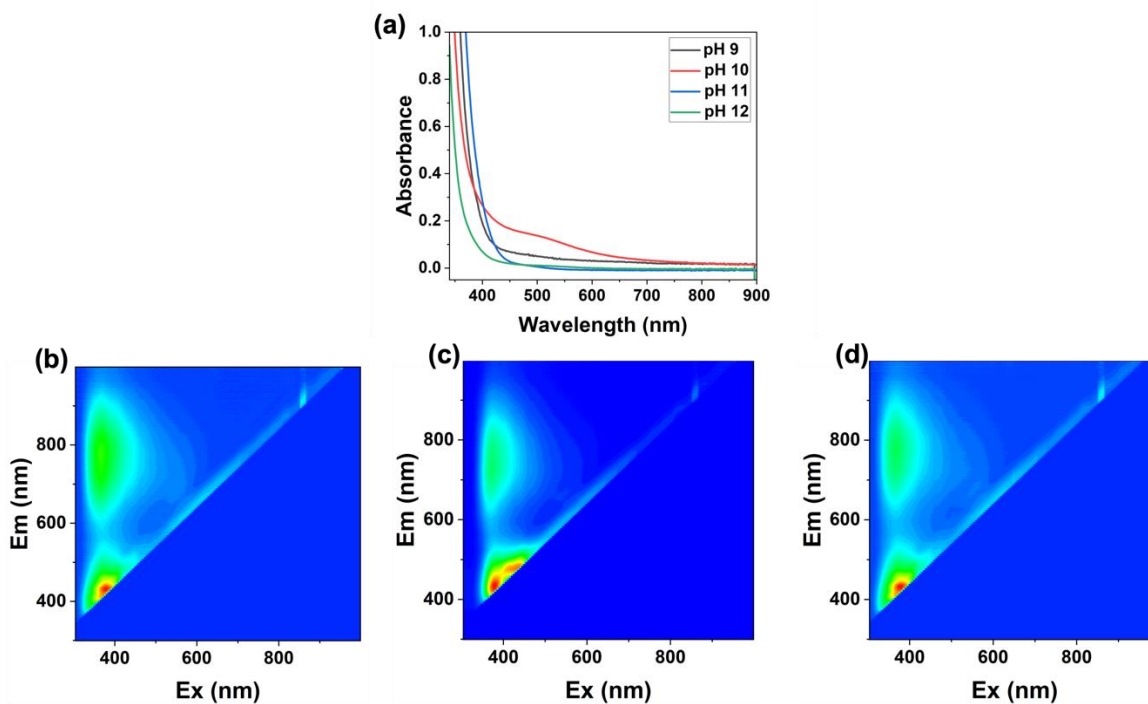

**Fig S2.** (a) absorbance of the Au(RGDC) products at different pHs using 3 mM Au, 9 mM RGDC, and 3 mM Omnirad-2959 after 30 min UVA irradiation along with Fluorescence EEM spectra of the products at pH (b) 9, (c) 11, (d) 12.

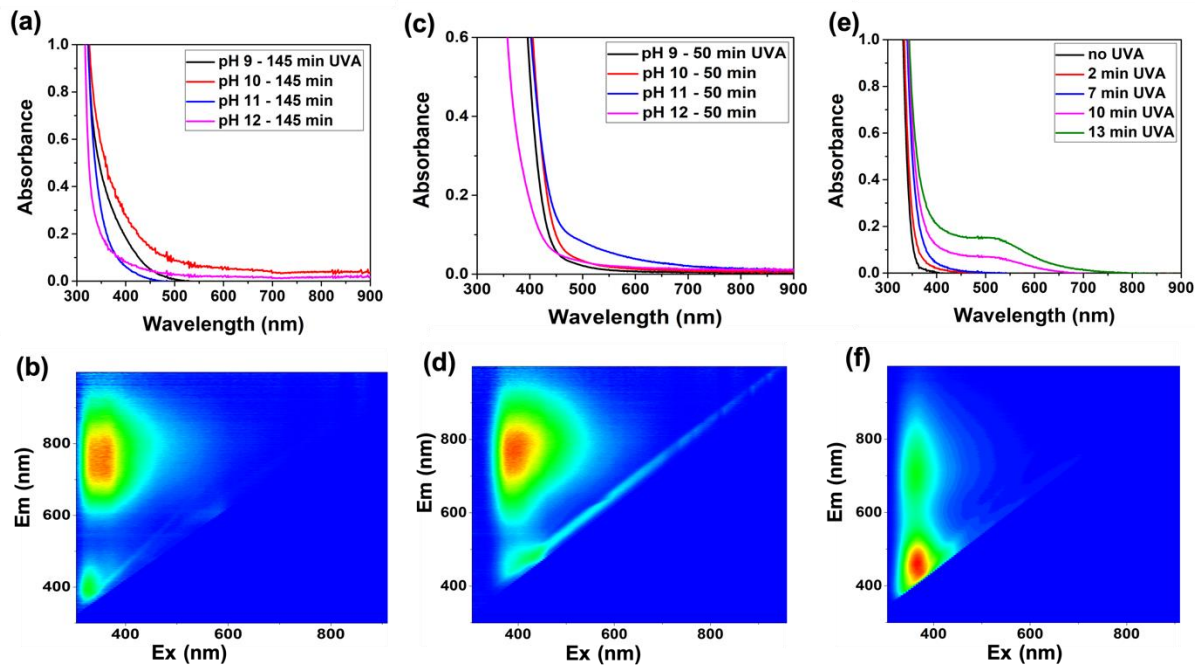

**Fig S3.** Absorbance and emission of Au(RGDC) clusters using 1 mM Au (a and b), 2 mM Au (c and d), and 1 mM of Au with 3 mM of Omnirad-2959 (e and f). EEM plots have been shown at pH 10.

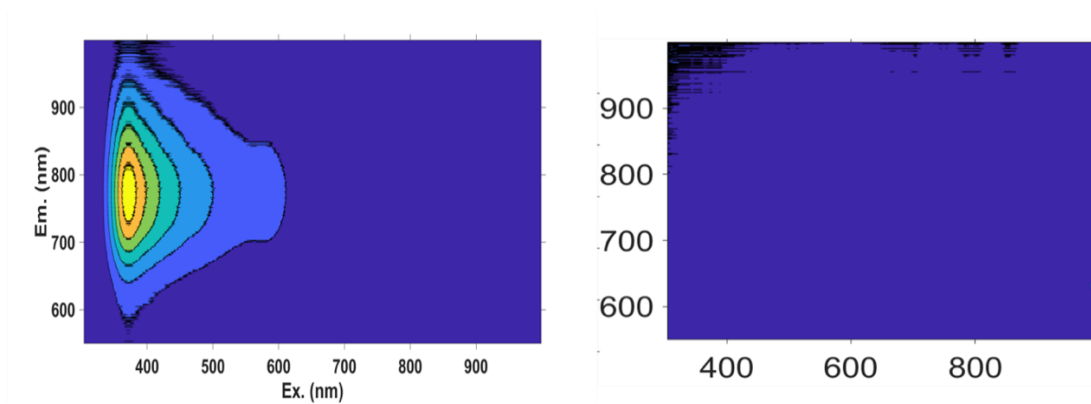

**Fig S4.** EEM spectra of the nanoclusters using 2-component model calculated with drEEM toolbox for MATLAB.

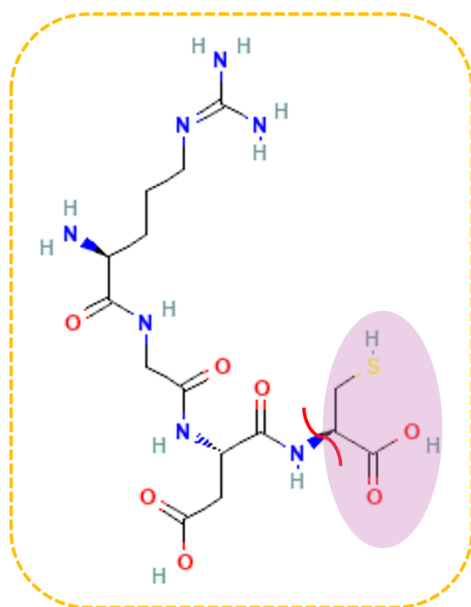

**Fig S5.** Structure of RGDC ligand, C-N bond is broken so that just a portion of ligand stays attached to the Au<sub>16</sub> core.

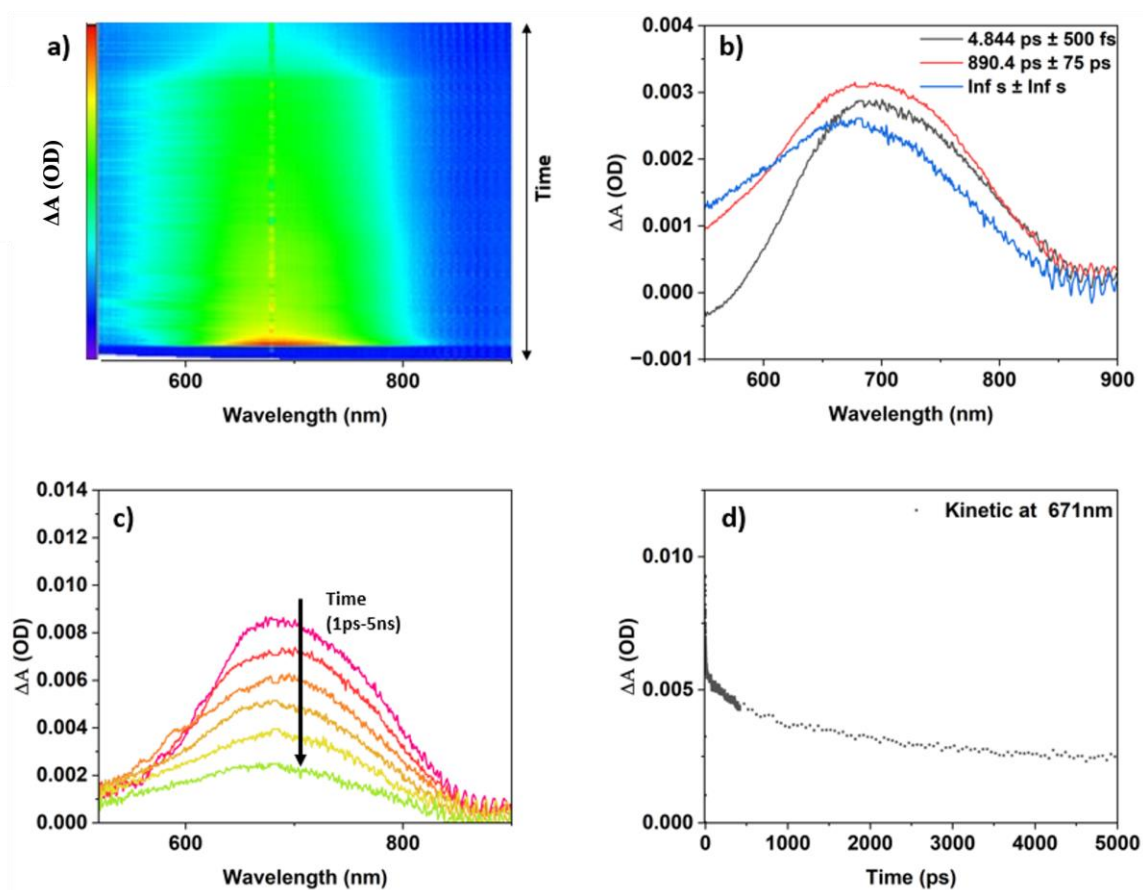

**Fig S6.** (a) Femtosecond transient absorption spectra of  $\text{Au}_{16}(\text{RGDC})_{14}$  clusters excited at 340 nm, (b) three lifetime components, simulated from global analysis, that model the overall transient absorption spectra of  $\text{Au}_{16}(\text{RGDC})_{14}$ , (c) Overlaid transient absorption spectra of  $\text{Au}_{16}(\text{RGDC})_{14}$  clusters obtained at delay time of  $t = 1$  ps after excitation, and (d) femtosecond transient decay trace of  $\text{Au}_{16}(\text{RGDC})_{14}$  clusters monitored at 671 nm.

**Table S1.** Amplitudes and lifetimes obtained from femtosecond transient absorption spectroscopy for  $\text{Au}_{16}(\text{RGDC})_{14}$  clusters, pumped at 340 nm and probed at 671 nm.

| $\lambda_{\text{probe}}$ | $\tau_1$ (ps)  | $A_1$                | $\tau_2$ (ps)      | $A_2$   | $\tau_3$ (ps)      | $A_3$   |
|--------------------------|----------------|----------------------|--------------------|---------|--------------------|---------|
| 671 nm                   | $14.3 \pm 1.7$ | $6.3 \times 10^{-4}$ | $1541.2 \pm 112.5$ | 0.00163 | $2212.2 \pm 105.4$ | 0.00268 |

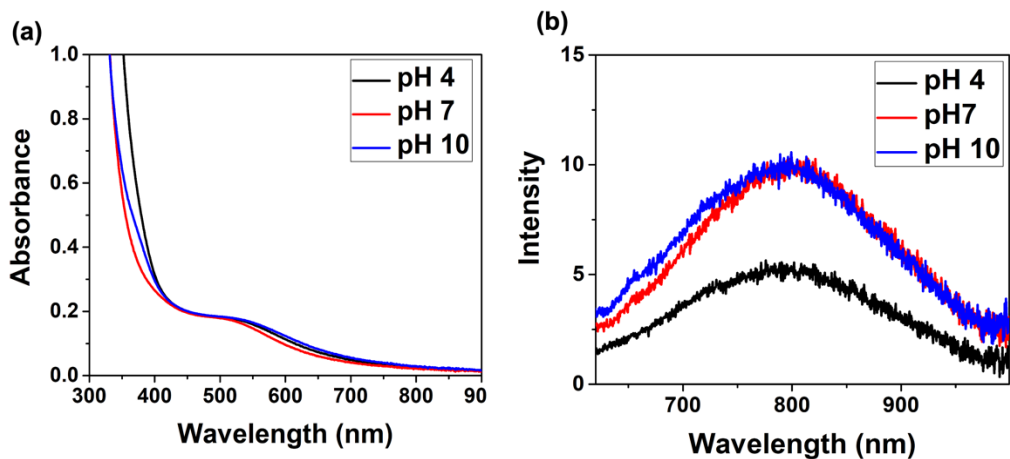

**Fig S7.** (a) Absorbance and (b) emission spectra of the Au<sub>16</sub>(RGDC)<sub>14</sub> clusters when brought to acidic, basic, and neutral pHs using minimum amount of either sodium hydroxide or acetic acid.

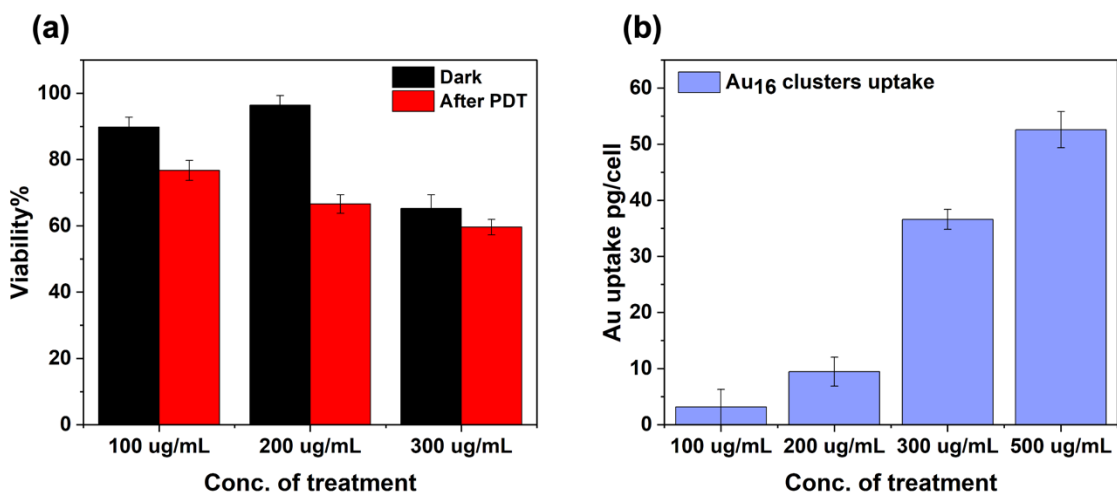

**Fig S8.** Viability and uptake of the KB cells incubated with Au<sub>16</sub>(RGDC)<sub>14</sub> clusters following a 20-minute irradiation using a 500 nm LED. Viability measurements taken 48 hours after the completion of irradiation.

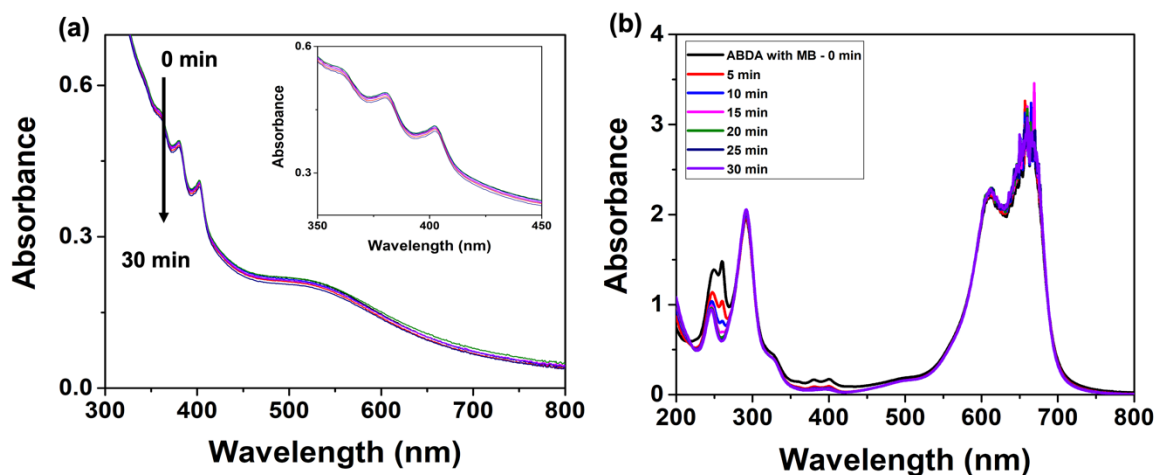

**Fig S9.** Absorbance spectra of the (a)  $\text{Au}_{16}(\text{RGDC})_{14}$  clusters and (b) MB in ABDA aqueous solution. No absorbance decrease was observed for the clusters, indicating they don't generate type II ROS.
